# Supplementary material
Source: Research Square preprint supplement (doi:10.21203/rs.3.rs-9003652/v1)
Supplement: Supplementary file 1 [file 64c39ba755dd1312fc08cf92.docx]

**Screening of Characteristic Peptide Biomarkers for Edible Locust Allergens by LC-MS/MS**

Yijun Pan 1,2, Wenhan Kang 1, Yang Wan 1, Jiukai Zhang 1, Xuguang Qiao2, Ning Yu 1*, Ying Chen 1*

1 Chinese Academy of Quality and Inspection & Testing, Beijing 100176, China.

2 College of Food Science and Engineering, Shandong Agricultural University, Taian Shandong 271018, China.

**Corresponding author 1:** Ying Chen, Chinese Academy of Inspection and Quarantine, No. 11 Ronghua Nanlu, Beijing Economic-Technological Development Area, 100176, Beijing, China.

**Tel.**: +86-10-53897910, **E-mail:** [chenyingcaiq@163.com](mailto:chenyingcaiq@163.com)

**Corresponding author 2:** Ning Yu, Chinese Academy of Inspection and Quarantine, No. 11 Ronghua Nanlu, Beijing Economic-Technological Development Area, 100176, Beijing, China.

**Tel.**: +86-18600562988, **E-mail:** [yu962925@126.com](mailto:yu962925@126.com)

**Appendix**


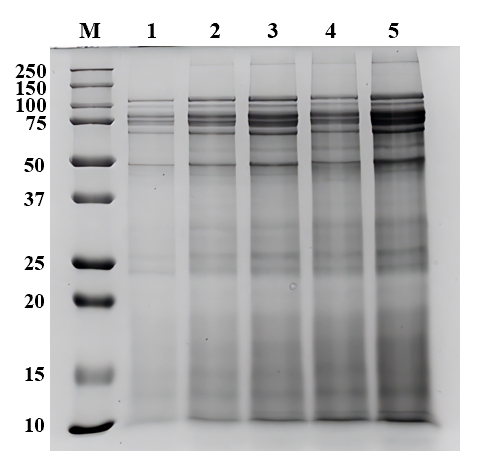


**Figure S1 SDS-PAGE analysis of locust protein extraction solution**

Note: M: Marker; Lanes 1-5 represent protein concentrations of 1~5 mg/mL, respectively.
